# Supplementary material
Source: PubMed Central journal article supplement (PMC3193998)
Supplement: NIHMS250539-supplement-1_si_001.pdf [file NIHMS250539-supplement-1_si_001.pdf]

## Supporting Information

### **The Role of Zinc in Isoform Selective Inhibitor Binding to Neuronal Nitric Oxide Synthase**

Silvia L. Delker,<sup>a</sup> Fengtian Xue,<sup>b,c</sup> Huiying Li,<sup>a</sup> Jianguo Fang<sup>b</sup>, Joumana Jamal,<sup>a</sup>  
Richard B. Silverman,<sup>b\*</sup> and Thomas L. Poulos<sup>a\*</sup>

<sup>a</sup>*Departments of Molecular Biology and Biochemistry, Pharmaceutical Chemistry, and  
Chemistry, University of California, Irvine, California 92697-3900*

<sup>b</sup>*Department of Chemistry, Department of Biochemistry, Molecular Biology, and Cell  
Biology, Center for Molecular Innovation and Drug Discovery, Chemistry of Life  
Processes Institute, Northwestern University, 2145 Sheridan Road, Evanston, Illinois  
60208-3113*

<sup>c</sup>*Current address: Department of Chemistry, University of Louisiana at Lafayette,  
Lafayette, Louisiana 70504*

## Crystallographic Statistics and Supplementary Figures

**Table S1 Crystallographic data collection and refinement statistics (part 2)**

| Data set <sup>1</sup>                                | eNOS-3h                                       | eNOS-3k                                       | eNOS-3m                                       |
|------------------------------------------------------|-----------------------------------------------|-----------------------------------------------|-----------------------------------------------|
| <b>Data collection</b>                               |                                               |                                               |                                               |
| PDB code                                             | 3N5R                                          | 3N5S                                          | 3N5P                                          |
| Space group                                          | P2 <sub>1</sub> 2 <sub>1</sub> 2 <sub>1</sub> | P2 <sub>1</sub> 2 <sub>1</sub> 2 <sub>1</sub> | P2 <sub>1</sub> 2 <sub>1</sub> 2 <sub>1</sub> |
| Cell dimensions                                      |                                               |                                               |                                               |
| <i>a</i> , <i>b</i> , <i>c</i> (Å)                   | 57.9, 106.7, 156.9                            | 58.0, 106.8, 157.0                            | 60.0, 106.1, 158.6                            |
| Resolution (Å)                                       | 2.57 (2.61-2.57)                              | 2.18 (2.22-2.18)                              | 2.40 (2.44-2.40)                              |
| <i>R</i> <sub>sym</sub> or <i>R</i> <sub>merge</sub> | 0.082 (0.598)                                 | 0.067 (0.559)                                 | 0.096 (0.725)                                 |
| <i>I</i> / $\sigma$ <i>I</i>                         | 14.6 (1.9)                                    | 16.8 (1.9)                                    | 12.1 (1.4)                                    |
| No. unique reflections                               | 31,470                                        | 51,666                                        | 38,918                                        |
| Completeness (%)                                     | 98.8 (99.9)                                   | 99.8 (100.0)                                  | 95.4 (98.7)                                   |
| Redundancy                                           | 3.6 (3.7)                                     | 3.6 (3.7)                                     | 3.6 (3.5)                                     |
| <b>Refinement</b>                                    |                                               |                                               |                                               |
| Resolution (Å)                                       | 2.57                                          | 2.18                                          | 2.39                                          |
| No. reflections used                                 | 29,883                                        | 49,032                                        | 36,918                                        |
| <i>R</i> <sub>work</sub> / <i>R</i> <sub>free</sub>  | 0.181/0.244                                   | 0.177/0.220                                   | 0.206/0.260                                   |
| No. atoms                                            |                                               |                                               |                                               |
| Protein                                              | 6456                                          | 6438                                          | 6461                                          |
| Ligand/ion                                           | 197                                           | 199                                           | 219                                           |
| Water                                                | 110                                           | 383                                           | 137                                           |
| R.m.s. deviations                                    |                                               |                                               |                                               |
| Bond lengths (Å)                                     | 0.014                                         | 0.011                                         | 0.012                                         |
| Bond angles (°)                                      | 1.534                                         | 1.350                                         | 1.498                                         |

| Data set <sup>1</sup>                                 | eNOS N368D-3j                                 | eNOS N368D-3k                                 | eNOS N368D-3n                                 |
|-------------------------------------------------------|-----------------------------------------------|-----------------------------------------------|-----------------------------------------------|
| <b>Data collection</b>                                |                                               |                                               |                                               |
| PDB code                                              | 3N6F                                          | 3N6G                                          | 3N6E                                          |
| Space group                                           | P2 <sub>1</sub> 2 <sub>1</sub> 2 <sub>1</sub> | P2 <sub>1</sub> 2 <sub>1</sub> 2 <sub>1</sub> | P2 <sub>1</sub> 2 <sub>1</sub> 2 <sub>1</sub> |
| Cell dimensions<br><i>a</i> , <i>b</i> , <i>c</i> (Å) | 58.0, 106.7, 157.2                            | 57.7, 106.4, 156.9                            | 58.0, 106.9, 157.1                            |
| Resolution (Å)                                        | 2.18 (2.22-2.18)                              | 2.22 (2.26-2.22)                              | 2.20 (2.24-2.20)                              |
| <i>R</i> <sub>sym</sub> or <i>R</i> <sub>merge</sub>  | 0.062 (0.551)                                 | 0.065 (0.705)                                 | 0.068 (0.640)                                 |
| <i>I</i> / $\sigma$ <i>I</i>                          | 20.4 (2.1)                                    | 20.6 (1.9)                                    | 19.0 (1.9)                                    |
| No. unique reflections                                | 51,400                                        | 49,005                                        | 50,214                                        |
| Completeness (%)                                      | 99.0 (96.5)                                   | 99.4 (98.3)                                   | 99.7 (98.6)                                   |
| Redundancy                                            | 4.0 (3.9)                                     | 4.0 (3.9)                                     | 3.9 (3.8)                                     |
| <b>Refinement</b>                                     |                                               |                                               |                                               |
| Resolution (Å)                                        | 2.18                                          | 2.21                                          | 2.20                                          |
| No. reflections used                                  | 48,775                                        | 46,518                                        | 47,647                                        |
| <i>R</i> <sub>work</sub> / <i>R</i> <sub>free</sub>   | 0.178/0.218                                   | 0.187/0.238                                   | 0.179/0.215                                   |
| No. atoms                                             |                                               |                                               |                                               |
| Protein                                               | 6422                                          | 6448                                          | 6438                                          |
| Ligand/ion                                            | 199                                           | 199                                           | 201                                           |
| Water                                                 | 289                                           | 234                                           | 235                                           |
| R.m.s. deviations                                     |                                               |                                               |                                               |
| Bond lengths (Å)                                      | 0.011                                         | 0.013                                         | 0.010                                         |
| Bond angles (°)                                       | 1.350                                         | 1.470                                         | 1.339                                         |

| Data set <sup>1</sup>                                 | eNOS<br>N368D/V106M-3h                        | eNOS<br>N368D/V106M-<br>3j                    | eNOS<br>N368D/V106M-3k                        | eNOS<br>N368D/V106M-3n                        |
|-------------------------------------------------------|-----------------------------------------------|-----------------------------------------------|-----------------------------------------------|-----------------------------------------------|
| <b>Data collection</b>                                |                                               |                                               |                                               |                                               |
| PDB code                                              | 3N68                                          | 3N69                                          | 3N6A                                          | 3N67                                          |
| Space group                                           | P2 <sub>1</sub> 2 <sub>1</sub> 2 <sub>1</sub> |
| Cell dimensions<br><i>a</i> , <i>b</i> , <i>c</i> (Å) | 57.8, 106.6, 157.1                            | 58.2, 106.6, 157.0                            | 58.1, 106.6, 156.9                            | 58.0, 106.6, 156.8                            |
| Resolution (Å)                                        | 2.54 (2.58-2.54)                              | 2.10 (2.14-2.10)                              | 2.50 (2.54-2.50)                              | 2.10 (2.14-2.10)                              |
| <i>R</i> <sub>sym</sub> or <i>R</i> <sub>merge</sub>  | 0.079 (0.463)                                 | 0.074 (0.576)                                 | 0.103 (0.600)                                 | 0.061 (0.431)                                 |
| <i>I</i> / $\sigma$ <i>I</i>                          | 13.7 (1.8)                                    | 17.3 (2.2)                                    | 12.2 (1.6)                                    | 20.0 (2.5)                                    |
| No. unique<br>reflections                             | 32,342                                        | 57,493                                        | 34,483                                        | 54,937                                        |
| Completeness (%)                                      | 97.8 (96.7)                                   | 99.4 (99.9)                                   | 99.5 (95.3)                                   | 94.5 (88.3)                                   |
| Redundancy                                            | 3.5 (3.4)                                     | 4.0 (4.1)                                     | 3.6 (3.3)                                     | 3.8 (4.0)                                     |
| <b>Refinement</b>                                     |                                               |                                               |                                               |                                               |
| Resolution (Å)                                        | 2.53                                          | 2.10                                          | 2.49                                          | 2.09                                          |
| No. reflections<br>used                               | 30,718                                        | 54,552                                        | 32,727                                        | 52,119                                        |
| <i>R</i> <sub>work</sub> / <i>R</i> <sub>free</sub>   | 0.190/0.254                                   | 0.167/0.215                                   | 0.184/0.243                                   | 0.173/0.219                                   |
| No. atoms                                             |                                               |                                               |                                               |                                               |
| Protein                                               | 6428                                          | 6515                                          | 6432                                          | 6473                                          |
| Ligand/ion                                            | 191                                           | 187                                           | 199                                           | 201                                           |
| Water                                                 | 96                                            | 440                                           | 154                                           | 364                                           |
| R.m.s. deviations                                     |                                               |                                               |                                               |                                               |
| Bond lengths (Å)                                      | 0.014                                         | 0.016                                         | 0.013                                         | 0.016                                         |
| Bond angles (°)                                       | 1.530                                         | 1.512                                         | 1.470                                         | 1.509                                         |

| Data set <sup>1</sup>                                | eNOS H373S- <b>3j</b>                         | eNOS H373S- <b>3m</b>                         | eNOS H373S- <b>3n</b>                         |
|------------------------------------------------------|-----------------------------------------------|-----------------------------------------------|-----------------------------------------------|
| <b>Data collection</b>                               |                                               |                                               |                                               |
| PDB code                                             | 3N6B                                          | 3N6C                                          | 3N6D                                          |
| Space group                                          | P2 <sub>1</sub> 2 <sub>1</sub> 2 <sub>1</sub> | P2 <sub>1</sub> 2 <sub>1</sub> 2 <sub>1</sub> | P2 <sub>1</sub> 2 <sub>1</sub> 2 <sub>1</sub> |
| Cell dimensions<br><i>a, b, c</i> (Å)                | 57.7, 106.6, 157.8                            | 58.1, 105.7, 159.2                            | 57.2, 106.7, 156.8                            |
| Resolution (Å)                                       | 3.10 (3.15-3.10)                              | 3.05 (3.10-3.05)                              | 3.05 (3.10-3.05)                              |
| <i>R</i> <sub>sym</sub> or <i>R</i> <sub>merge</sub> | 0.097 (0.611)                                 | 0.152 (0.682)                                 | 0.118 (0.702)                                 |
| <i>I</i> / $\sigma$ <i>I</i>                         | 13.5 (1.8)                                    | 9.4 (1.7)                                     | 11.9 (2.0)                                    |
| No. unique reflections                               | 18,319                                        | 18,687                                        | 18,759                                        |
| Completeness (%)                                     | 99.2 (100.0)                                  | 97.8 (98.4)                                   | 99.2 (100.0)                                  |
| Redundancy                                           | 3.9 (3.9)                                     | 4.0 (3.7)                                     | 3.7 (3.8)                                     |
| <b>Refinement</b>                                    |                                               |                                               |                                               |
| Resolution (Å)                                       | 3.10                                          | 3.06                                          | 3.05                                          |
| No. reflections used                                 | 17,380                                        | 17,732                                        | 17,785                                        |
| <i>R</i> <sub>work</sub> / <i>R</i> <sub>free</sub>  | 0.187/0.274                                   | 0.233/0.332                                   | 0.199/0.289                                   |
| No. atoms                                            |                                               |                                               |                                               |
| Protein                                              | 6401                                          | 6398                                          | 6411                                          |
| Ligand/ion                                           | 219                                           | 197                                           | 181                                           |
| Water                                                | 10                                            | 26                                            | 22                                            |
| R.m.s. deviations                                    |                                               |                                               |                                               |
| Bond lengths (Å)                                     | 0.016                                         | 0.014                                         | 0.016                                         |
| Bond angles (°)                                      | 1.704                                         | 1.534                                         | 1.704                                         |

| Data set <sup>†</sup>                                            | nNOS-3h                                       | nNOS-3k                                       | nNOS-3m                                       |
|------------------------------------------------------------------|-----------------------------------------------|-----------------------------------------------|-----------------------------------------------|
| <b>Data collection</b>                                           |                                               |                                               |                                               |
| PDB code                                                         | 3N5V                                          | 3N5X                                          | 3N5Z                                          |
| Space group                                                      | P2 <sub>1</sub> 2 <sub>1</sub> 2 <sub>1</sub> | P2 <sub>1</sub> 2 <sub>1</sub> 2 <sub>1</sub> | P2 <sub>1</sub> 2 <sub>1</sub> 2 <sub>1</sub> |
| Cell dimensions                                                  |                                               |                                               |                                               |
| <i>a, b, c</i> (Å)                                               | 52.1, 112.1, 165.5                            | 52.3, 111.1, 164.8                            | 51.8, 111.1, 164.6                            |
| Resolution (Å)                                                   | 2.30 (2.34-2.30)                              | 1.80 (1.83-1.80)                              | 2.18 (2.22-2.18)                              |
| <i>R</i> <sub>sym</sub> or <i>R</i> <sub>merge</sub>             | 0.071 (0.48)                                  | 0.058 (0.501)                                 | 0.065 (0.486)                                 |
| <i>I</i> / $\sigma I$                                            | 9.3 (2.1)                                     | 25.2 (2.6)                                    | 21.6 (2.1)                                    |
| No. unique reflections                                           | 43,487                                        | 89,351                                        | 49,860                                        |
| Completeness (%)                                                 | 98.9 (98.2)                                   | 99.6 (100.0)                                  | 99.2 (94.2)                                   |
| Redundancy                                                       | 5.4 (3.8)                                     | 4.1 (4.0)                                     | 4.0 (3.8)                                     |
| <b>Refinement</b>                                                |                                               |                                               |                                               |
| Resolution (Å)                                                   | 2.30                                          | 1.80                                          | 2.18                                          |
| No. reflections used                                             | 41,255                                        | 84,829                                        | 47,303                                        |
| <i>R</i> <sub>work</sub> / <i>R</i> <sub>free</sub> <sup>2</sup> | 0.185/0.238                                   | 0.173/0.198                                   | 0.194/0.243                                   |
| No. atoms                                                        |                                               |                                               |                                               |
| Protein                                                          | 6682                                          | 6713                                          | 6668                                          |
| Ligand/ion                                                       | 182                                           | 190                                           | 182                                           |
| Water                                                            | 191                                           | 635                                           | 195                                           |
| R.m.s. deviations                                                |                                               |                                               |                                               |
| Bond lengths (Å)                                                 | 0.014                                         | 0.012                                         | 0.014                                         |
| Bond angles (°)                                                  | 1.427                                         | 1.236                                         | 1.482                                         |

|                                                       | nNOS D597N-3n                                 | nNOS<br>D597N/M336V-3n                        | nNOS S602H-3j                                 | nNOS S602H-3n                                 |
|-------------------------------------------------------|-----------------------------------------------|-----------------------------------------------|-----------------------------------------------|-----------------------------------------------|
| <b>Data collection</b>                                |                                               |                                               |                                               |                                               |
| PDB code                                              | 3N64                                          | 3N63                                          | 3N65                                          | 3N66                                          |
| Space group                                           | P2 <sub>1</sub> 2 <sub>1</sub> 2 <sub>1</sub> |
| Cell dimensions<br><i>a</i> , <i>b</i> , <i>c</i> (Å) | 51.8, 110.2, 164.2                            | 51.8, 111.0, 164.0                            | 52.0, 110.6, 164.2                            | 51.9, 110.6, 164.0                            |
| Resolution (Å)                                        | 1.95 (1.98-1.95)                              | 2.00 (2.03-2.00)                              | 1.80 (1.83-1.80)                              | 1.78 (1.81-1.78)                              |
| <i>R</i> <sub>sym</sub> or <i>R</i> <sub>merge</sub>  | 0.065 (0.543)                                 | 0.065 (0.464)                                 | 0.060 (0.593)                                 | 0.051 (0.651)                                 |
| <i>I</i> / $\sigma$ <i>I</i>                          | 22.5 (2.5)                                    | 20.9 (2.0)                                    | 28.1 (2.5)                                    | 29.1 (2.2)                                    |
| No. unique reflections                                | 69,474                                        | 62,815                                        | 88,164                                        | 91,167                                        |
| Completeness (%)                                      | 99.8 (100.0)                                  | 97.0 (82.4)                                   | 99.4 (99.0)                                   | 99.6 (99.7)                                   |
| Redundancy                                            | 4.0 (4.0)                                     | 3.9 (3.2)                                     | 5.1 (5.0)                                     | 4.0 (3.9)                                     |
| <b>Refinement</b>                                     |                                               |                                               |                                               |                                               |
| Resolution (Å)                                        | 1.95                                          | 2.00                                          | 1.80                                          | 1.78                                          |
| No. reflections used                                  | 65,979                                        | 59,663                                        | 83,704                                        | 86,523                                        |
| <i>R</i> <sub>work</sub> / <i>R</i> <sub>free</sub>   | 0.183/0.217                                   | 0.195/0.236                                   | 0.167/0.194                                   | 0.182/0.216                                   |
| No. atoms                                             |                                               |                                               |                                               |                                               |
| Protein                                               | 6662                                          | 6566                                          | 6746                                          | 6682                                          |
| Ligand/ion                                            | 158                                           | 157                                           | 249                                           | 174                                           |
| Water                                                 | 371                                           | 267                                           | 679                                           | 449                                           |
| R.m.s. deviations                                     |                                               |                                               |                                               |                                               |
| Bond lengths (Å)                                      | 0.013                                         | 0.013                                         | 0.013                                         | 0.013                                         |
| Bond angles (°)                                       | 1.404                                         | 1.424                                         | 1.470                                         | 1.361                                         |

<sup>1</sup> See Table 1 for the inhibitor codes and formula.

<sup>2</sup> A 5% of reflections has been set aside during the entire course of refinement for the free R calculation only. For each NOS isoform the choice of free R flags have been kept the same as those used in the starting model data set.

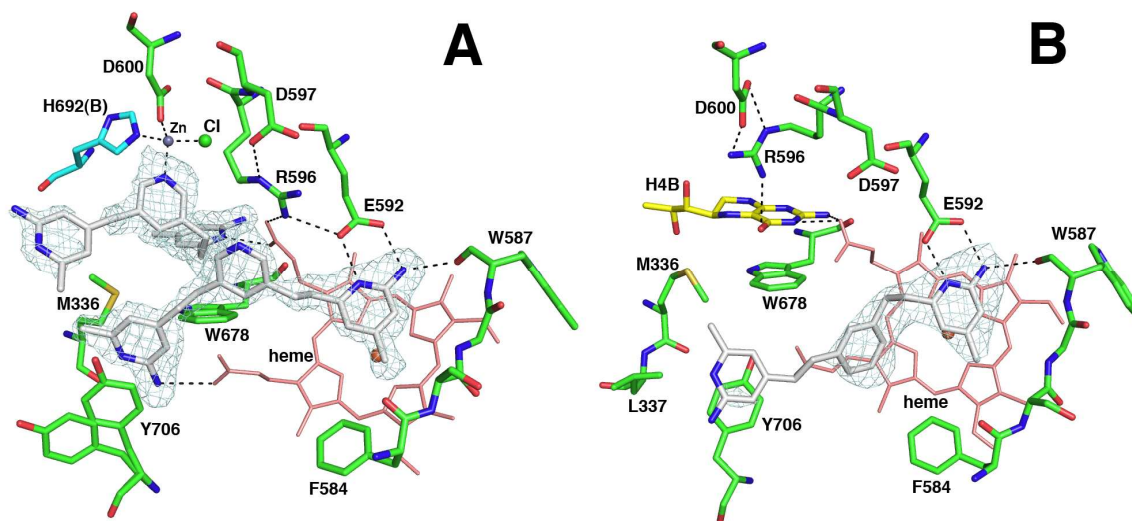

**Figure S1** The active site of (A) nNOS with two molecules of **3k** bound or (B) nNOS complexed with one molecule of **3h**. The sigma-A weighted  $F_o - F_c$  omit density maps for the inhibitors are shown at  $3\sigma$  contour level. Major hydrogen bonds and the Zn coordination sphere are depicted with dashed lines. Note the differences in the Tyr706 side chain position: in panel A, Tyr706 swings out (two alternate conformations) allowing one of the aminopyridine rings of **3k** to make hydrogen bond with the heme propionate D; in panel B, Tyr706 is in its original rotamer position that hydrogen bonds with the heme propionate D. The second aminopyridine of **3h** (B) is less well defined but likely stacks with Tyr706.



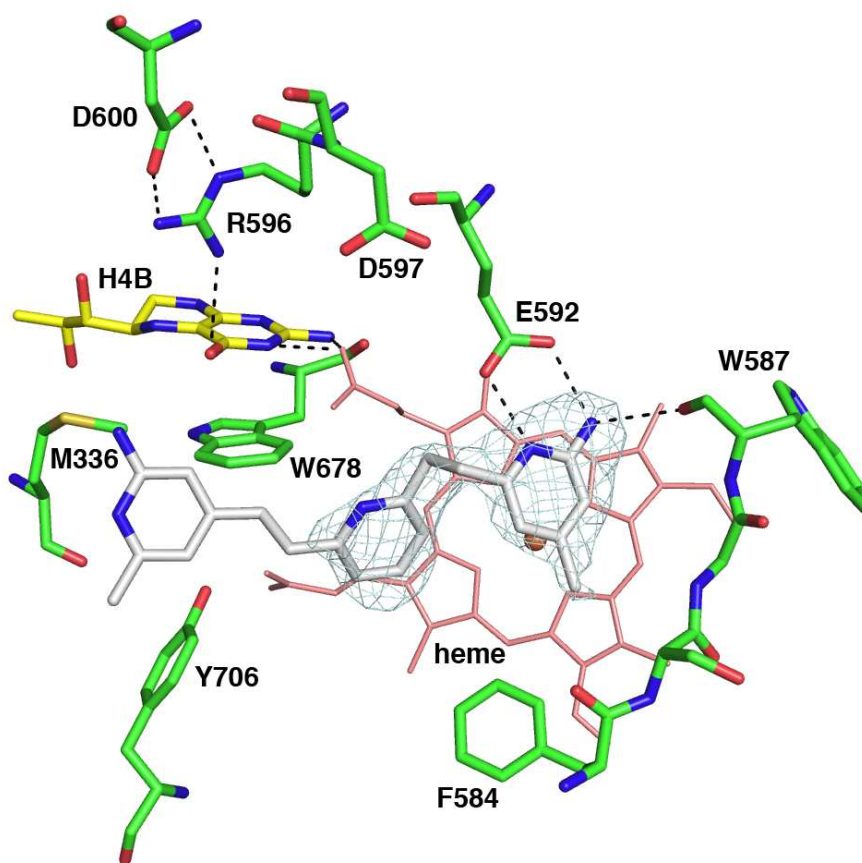

**Figure S2** The active site of nNOS with one molecule of **3m** bound. Shown also the sigma-A weighted  $F_o - F_c$  omit density map for the inhibitor contoured at  $3\sigma$ . Major hydrogen bonds are depicted with dash lines. The second aminopyridine of **3m** is disordered indicated by poor density in the region.

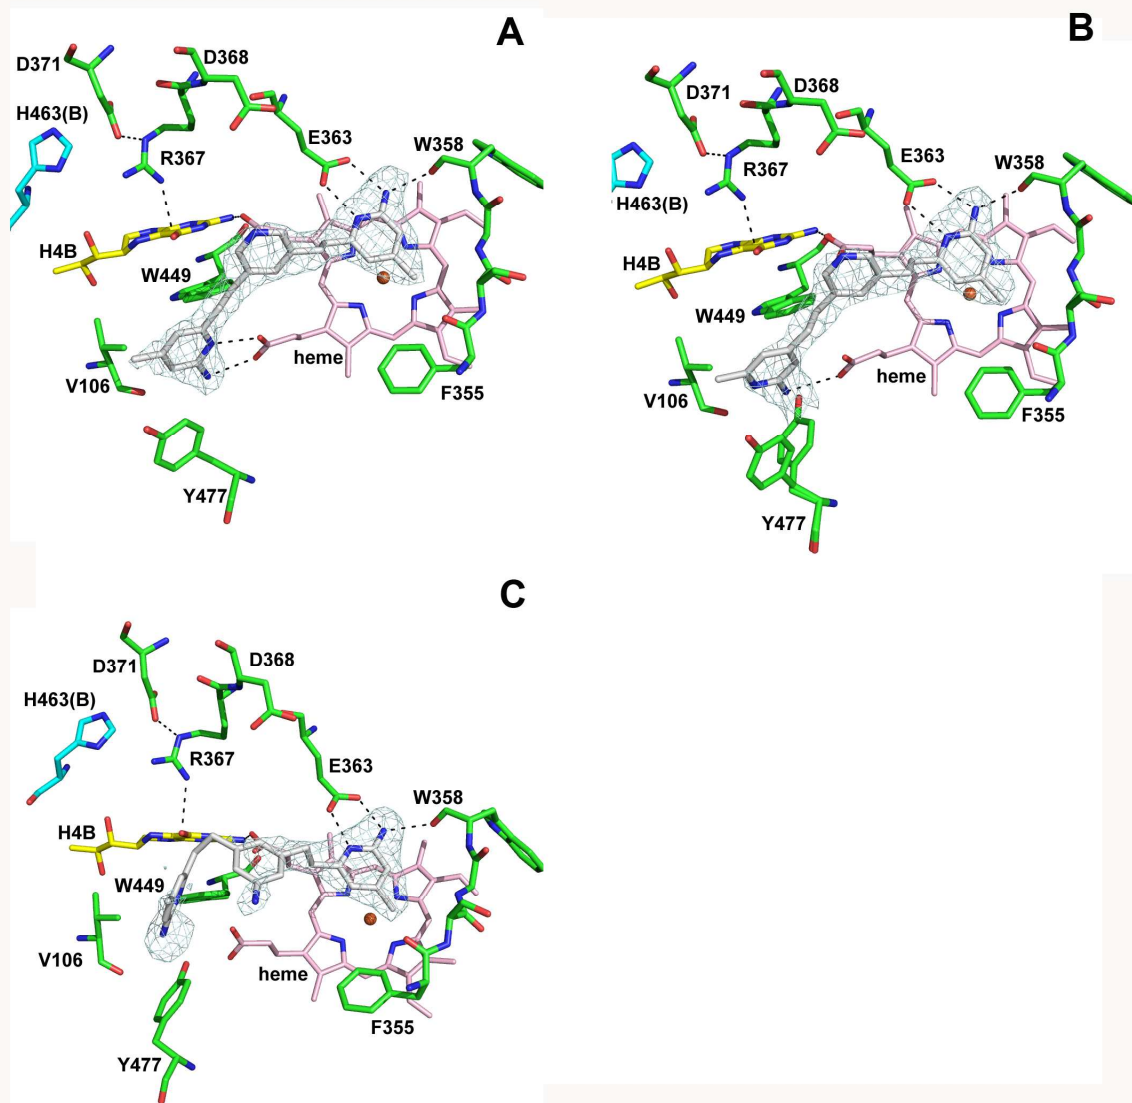

**Figure S3** The active site of eNOS N368D mutant with (A) one molecule of **3j** bound or (B) with one molecule of **3k** bound or (C) with inhibitor **3n** bound. The sigma-A weighted  $F_o - F_c$  omit density maps for the inhibitors are shown at  $3.0 \sigma$  (**3j**, **3k**) or  $2.5 \sigma$  (**3n**) contour level. Major hydrogen bonds are depicted with dashed lines. Note the differences in the Y477 side chain position: in both panels A and B, Y477 swings out allowing one of the aminopyridine rings of **3j** or **3k** to make hydrogen bond with the heme propionate D; in panel C, Y477 is in its original rotamer position that hydrogen bonds with the heme propionate D. The second aminopyridine of **3n** is partially disordered.

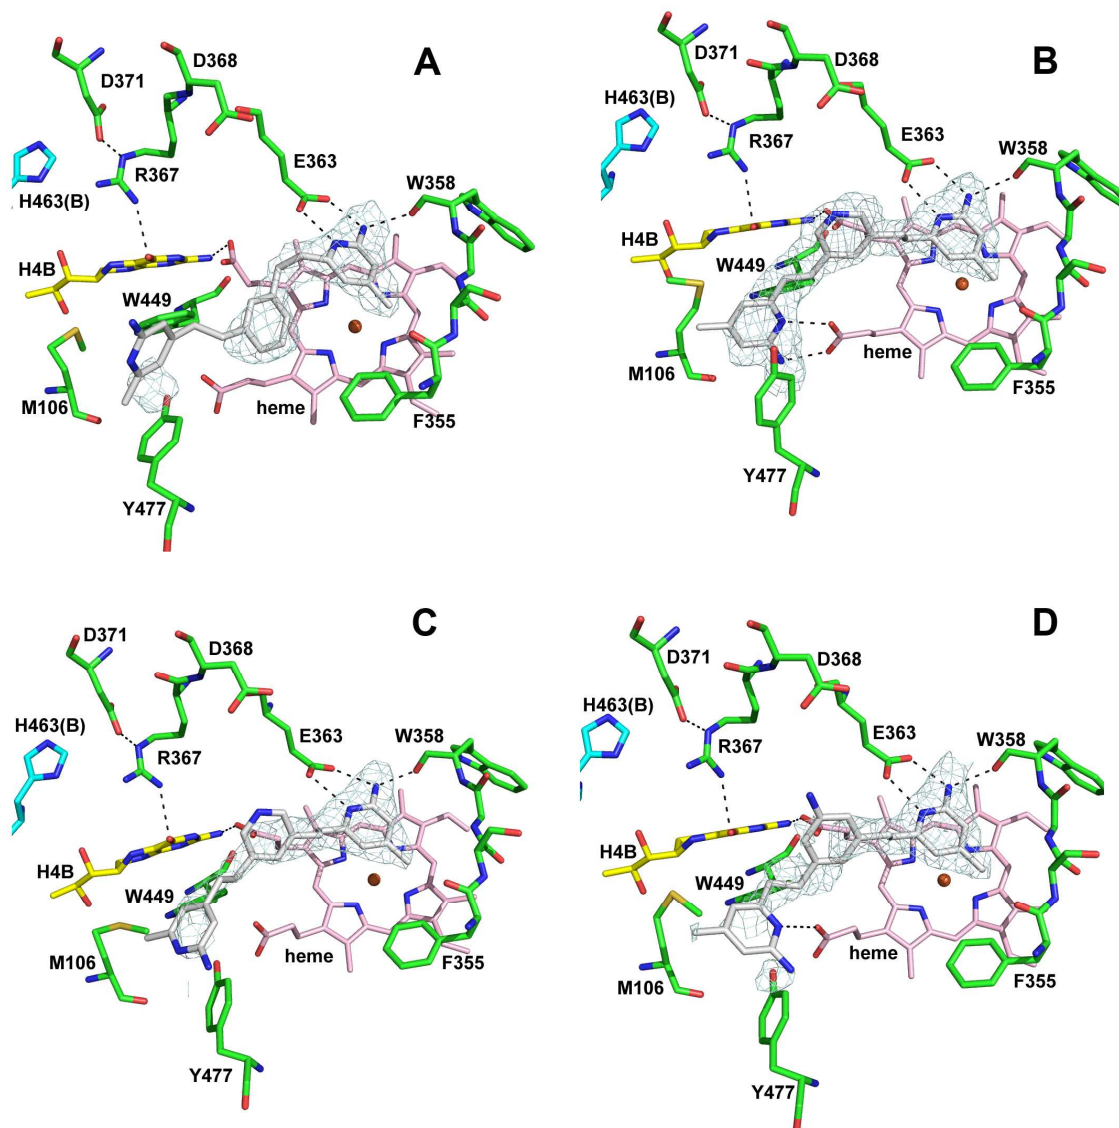

**Figure S4** The active site of eNOS N368D/V106M double mutant with (A) one molecule of **3h** or (B) one molecule of **3j** or (C) one molecule of **3k** or (D) inhibitor **3n** bound. The sigma-A weighted  $F_o-F_c$  omit density maps for the inhibitors are shown at  $3.0 \sigma$  (**3k**) or  $2.5 \sigma$  (**3h**, **3k**, **3n**) contour level. Major hydrogen bonds are depicted with dashed lines. Note the differences in the Y477 side chain position: in panel B, it swings out allowing one of the aminopyridine rings of **3k** to make hydrogen bond with the heme propionate D; in panels A and C, Y477 is in its original rotamer position that hydrogen bonds with the heme propionate D; in panel D, Y477 is in its original rotamer position making H-bond with the heme propionate D, but the second aminopyridine ring of **3n** contorts to also make a weak hydrogen bond with the other oxygen from the same propionate. In panels A, C, and D, weak density for the second aminopyridine of inhibitor indicates disordering.

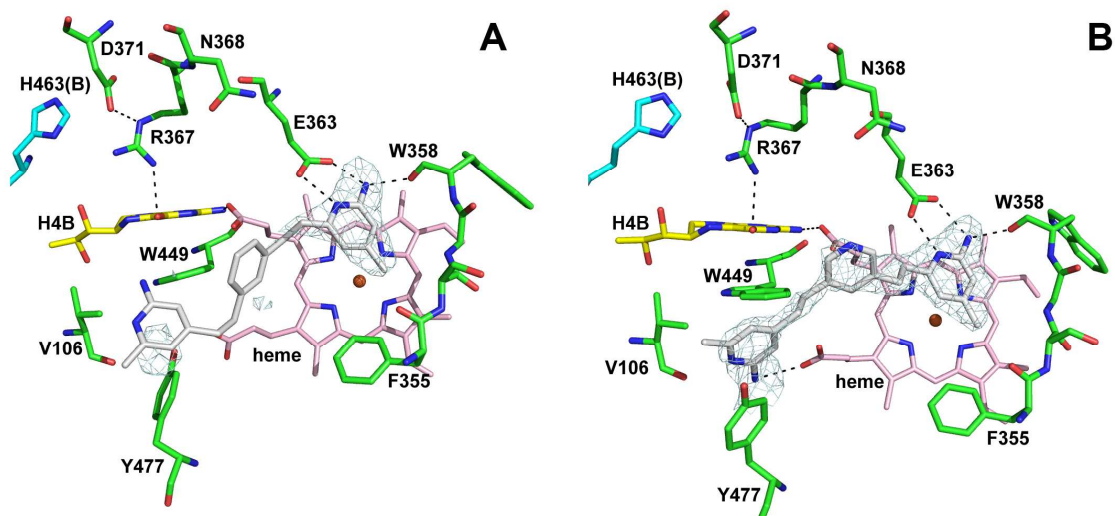

**Figure S5** The active site of eNOS (A) with one molecule of **3h** or (B) with one molecule of **3k** bound. The sigma-A weighted Fo-Fc omit density maps for the inhibitors are shown at 2.5  $\sigma$  (**3h**) or 3.0  $\sigma$  (**3k**) contour level. Major hydrogen bonds are depicted with dashed lines. Note the differences in the Y477 side chain position: in panel B, Y477 swings out allowing one of the aminopyridine rings of **3k** to make hydrogen bond with the heme propionate D; in panel A, Y477 is in its original rotamer position that hydrogen bonds with the heme propionate D. The second aminopyridine of **3h** in panel A is disordered.

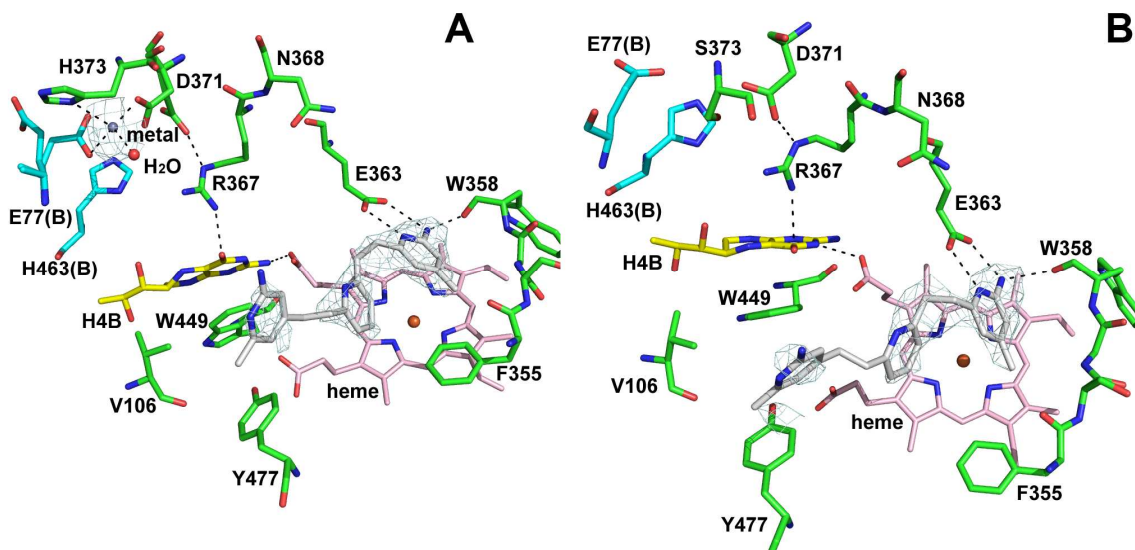

**Figure S6** The active site of (A) eNOS with one molecule of **3m** bound or (B) eNOS H373S mutant complexed with one molecule of **3m**. The sigma-A weighted Fo-Fc omit density maps for the inhibitors are shown at 2.5  $\sigma$  contour level. Major hydrogen bonds and the unknown metal coordination sphere are depicted with dashed lines. In panel A, R367 does not swing out and the Zn site seen in nNOS was not observed, however a partially occupied metal site was discovered nearby. The metal site is ligated with the eNOS unique His373, one out of two alternate rotamers of the conserved Asp371 and Glu77 from B subunit, and a water molecule. The compound **3m** binds in the same manner in both eNOS and eNOS H373S mutant, but we did not observe the unknown metal or alternate conformations of residues Asp371 and Glu77 (B subunit) in the mutant.

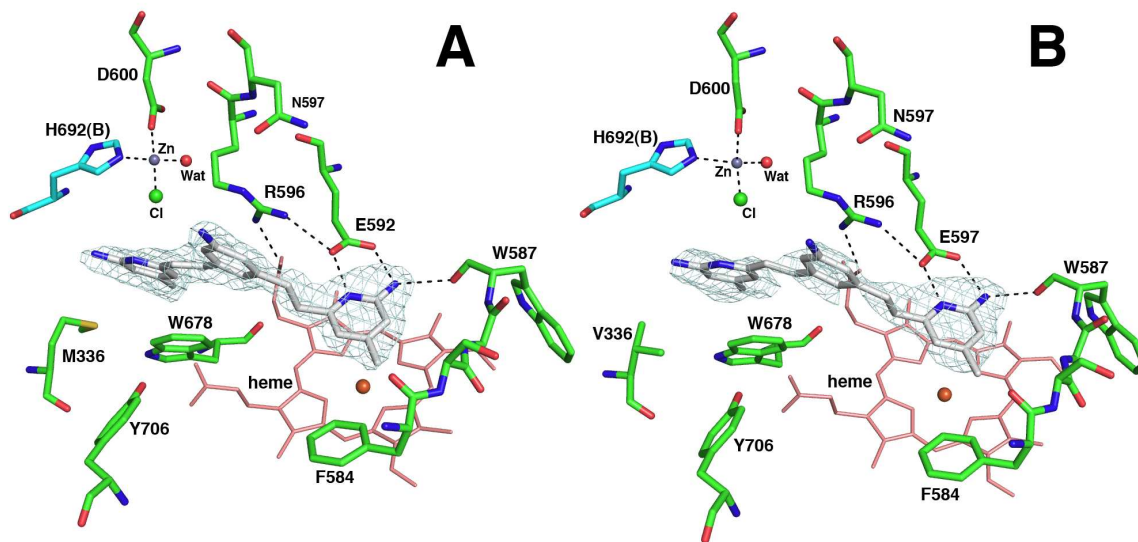

**Figure S7** The active site of (A) nNOS D597N or (B) nNOS D597N/M336V mutant with inhibitor **3n** bound. The sigma-A weighted  $F_o-F_c$  omit density maps for the inhibitors are shown at  $3\sigma$  contour level. Major hydrogen bonds and the Zn coordination sphere are depicted with dashed lines.

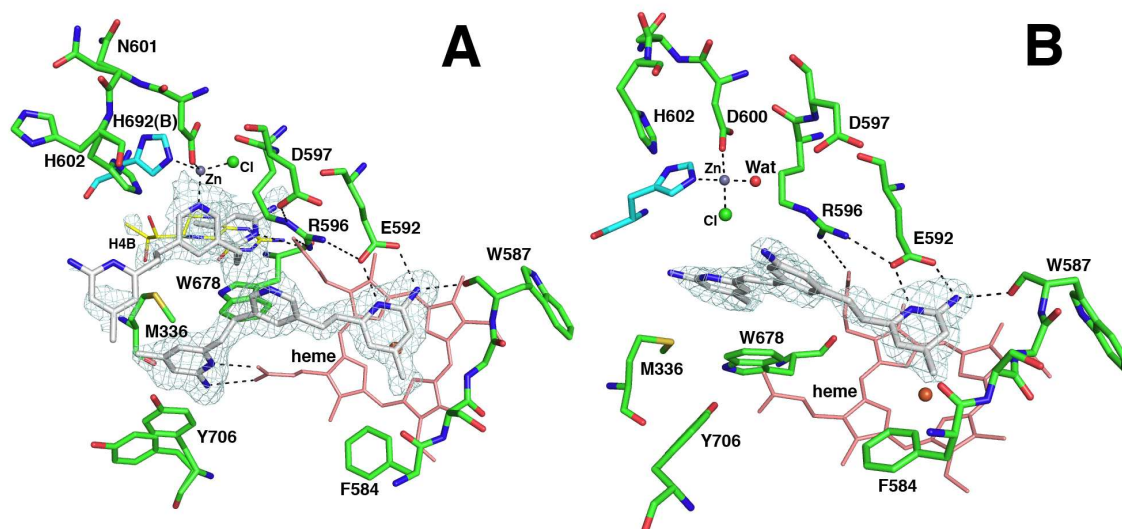

**Figure S8** The active site of nNOS S602H mutant with (A) two molecules of **3j** or (B) one molecule of **3n** bound. The sigma-A weighted  $F_o-F_c$  omit density maps for the inhibitors are shown at  $2.5 \sigma$  (**3j**) or  $3 \sigma$  (**3n**) contour level. Major hydrogen bonds and the Zn coordination sphere are depicted with dashed lines. In panel A the second molecule of **3j** is only partially occupied (occupancy  $\sim 0.7$ ) therefore H<sub>4</sub>B is sharing the same space (occupancy  $\sim 0.3$ ); also the side chains of Asn601, His602, and Tyr706 show alternate conformations.

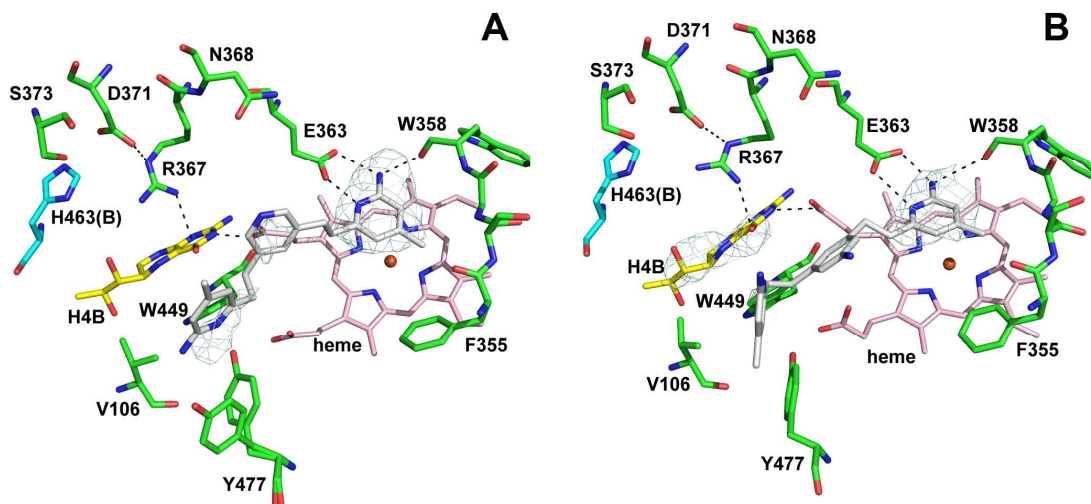

**Figure S9** The active site of eNOS H373S mutant (A) bound with inhibitor **3j** or (B) with ligand **3n** bound. The sigma-A weighted Fo-Fc omit density maps for the inhibitors are shown at 2.5  $\sigma$  contour level. Major hydrogen bonds are depicted with dashed lines. In panel B, the second aminopyridine of **3n** is partially disordered. The H<sub>4</sub>B (yellow) is not disturbed by ligand binding illustrated by the omit electron density for the pterin at 2.5  $\sigma$ .
